# Supplementary material for: Modeling the Effects of Helminth Infection on the Transmission Dynamics of Mycobacterium tuberculosis under Optimal Control Strategies
Source: Comput Math Methods Med. 2020 Nov 17;2020:8869377. doi: 10.1155/2020/8869377 (PMC7688359; doi:10.1155/2020/8869377)
Supplement: Supplementary Materials — The supplementary material related to this article comprises the MATLAB codes used for numerical simulations. [file 8869377.f1.zip]

Archive with 13 entries (13 files):
- SuplimentaryMaterials_Aristide/case3Control.mat
- SuplimentaryMaterials_Aristide/case3State.mat
- SuplimentaryMaterials_Aristide/case5.mat
- SuplimentaryMaterials_Aristide/Control_COIN.asv
- SuplimentaryMaterials_Aristide/Control_COIN.m
- SuplimentaryMaterials_Aristide/Cost.mat
- SuplimentaryMaterials_Aristide/Object_function.m
- SuplimentaryMaterials_Aristide/rk4back.m
- SuplimentaryMaterials_Aristide/rk4back_edit.m
- SuplimentaryMaterials_Aristide/rk4foward.m
- SuplimentaryMaterials_Aristide/rk4foward_edit.m
- SuplimentaryMaterials_Aristide/stide.m
- SuplimentaryMaterials_Aristide/stide_costate.m
