# Supplementary material for: Modeling the Effects of Helminth Infection on the Transmission Dynamics of Mycobacterium tuberculosis under Optimal Control Strategies
Source: Comput Math Methods Med. 2020 Nov 17;2020:8869377. doi: 10.1155/2020/8869377 (PMC7688359; doi:10.1155/2020/8869377)
Supplement: Supplementary Materials — The supplementary material related to this article comprises the MATLAB codes used for numerical simulations. [file 8869377.f1.zip › SuplimentaryMaterials_Aristide/Object_function.m]

clear all; close all; clc

load case7;


%% ACTUAL INVESTMENT THAT IS THE SOCIAL COST IS EXCLUDED 
u1=U(:,1); u2=U(:,2); u3=U(:,3); u4=U(:,4);
%XS1 =XX1(:,1); XS2 =XX1(:,2);

t=Tx;
n=length(t);
for i = 1:n
    %g1=A1*(X1(i)+Y1(i))+A2*(X2(i)+Y2(i));
    %g1=0; 
    %g2=Cp*u1(i)*Nh(i)+Cd1*u2(i)*(XS2(i)+YS2(i))+Cd2*u3(i)*(XS1(i)+YS1(i));
    h=B1/2*u1(i)*u1(i)+B2/2*u2(i)*u2(i)+B3/2*u3(i)*u3(i)+B4/2*u4(i)*u4(i);
    %Q(i) = g1+g2+h;
    Q(i) = h;
end
cost7=trapz(t,Q)
save cost7
